# Supplementary material
Source: publisher site journal article supplement (https://www.dovepress.com/article/348135)
Supplement: Supplementary file 1 [file get_supplementary_file.php]

1  
2  
3  
4  
5  
6  
7  
8  
9  
10  
11  
12  
13  
14  
15

## **SUPPLEMENTARY MATERIALS**

### **Efficacy of standardized rehabilitation in the treatment of diastasis rectus abdominis in postpartum women**

#### **SUPPLEMENTARY FIGURE LEGENDS**

##### **Figure S1-19. Standardized rehabilitation for non-surgical treatment of DRA.**

Before initiating the procedure, the patients were encouraged to relax the whole body. The total length of the procedure took about 70 minutes, 40 of which were for manual massage (**Part 1**) and 30 minutes for the treatment with electrophysiological equipment (**Part 2**).

##### **Part 1**

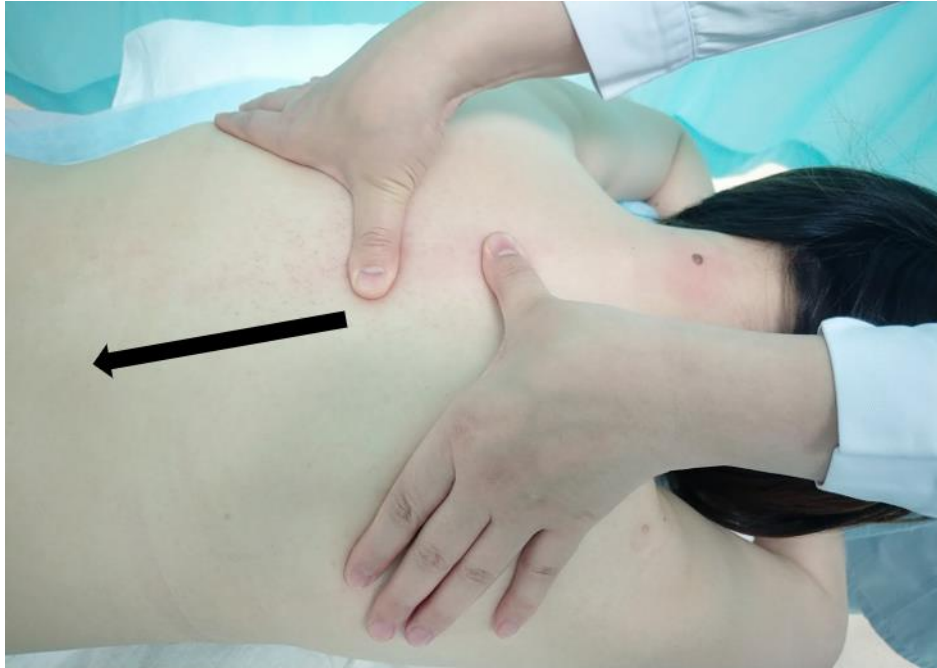

16 **Figure S1. Pushing Du Channel with a finger.** The person performing the treatment  
17 stood next to the patient's head, opened the thumb, and relaxed the remaining four  
18 fingers, which overlapped or were alternately pushed one way straight from the neck to  
19 the spine and the sacrum. The movement was slow and even. **2 minutes.** (Suppl. Fig.  
20 **1)**

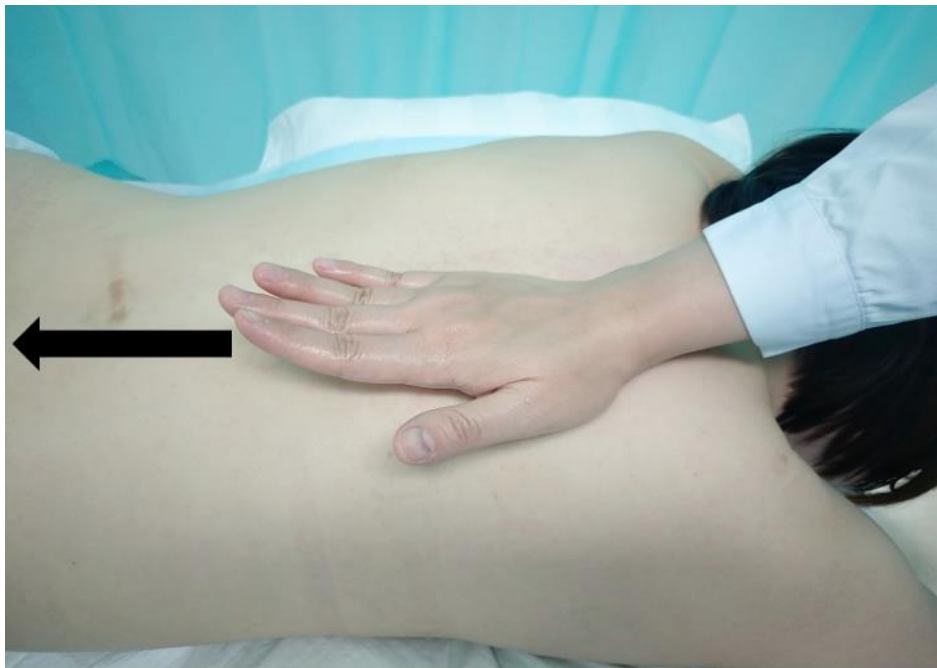

21 **Figure S2. Pushing erector spinae with palm.** The person performing the treatment  
22 stood next to the patient's head, with one or two palms overlapping, with the large and

23 small thenar as the focus point, performing a one-way straight push along both sides of  
24 the spine from top to bottom, sinking and moving slowly with uniform force. This  
25 approach can relieve the soreness of the lower back muscles and improve the strength  
26 of the waist. **1 minute. (Suppl. Fig. 2)**

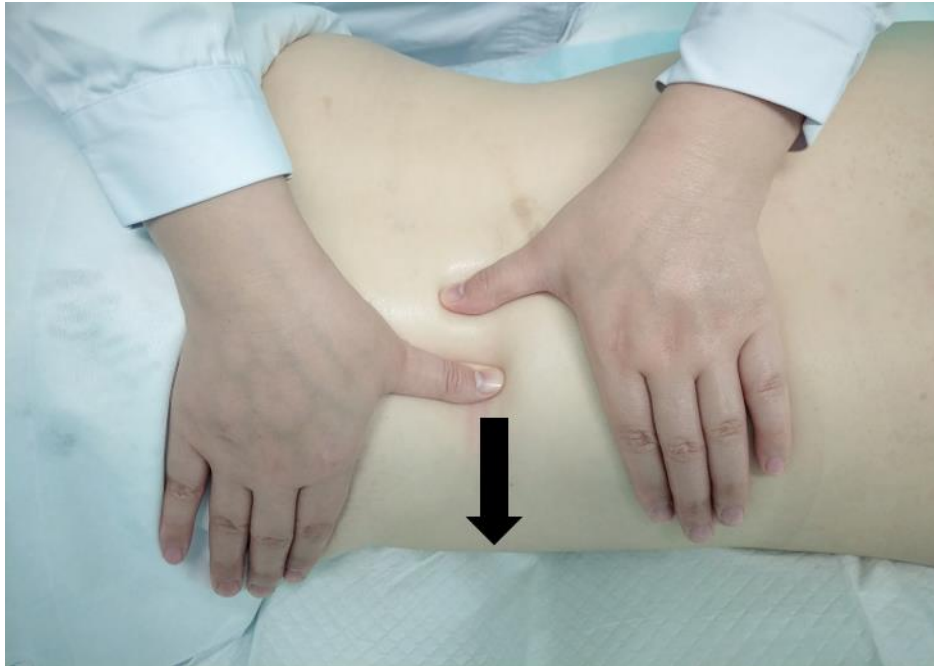

27 **Figure S3. Pushing the back Dai Mai acupoint with a finger.** The person performing  
28 the treatment opened the thumb of both hands, relaxed the other four fingers, and  
29 alternately pushed the two thumbs from the fourth lumbar vertebrae to the Dai Mai  
30 acupoints on both sides in one direction to relieve back pain. **1 minute.**

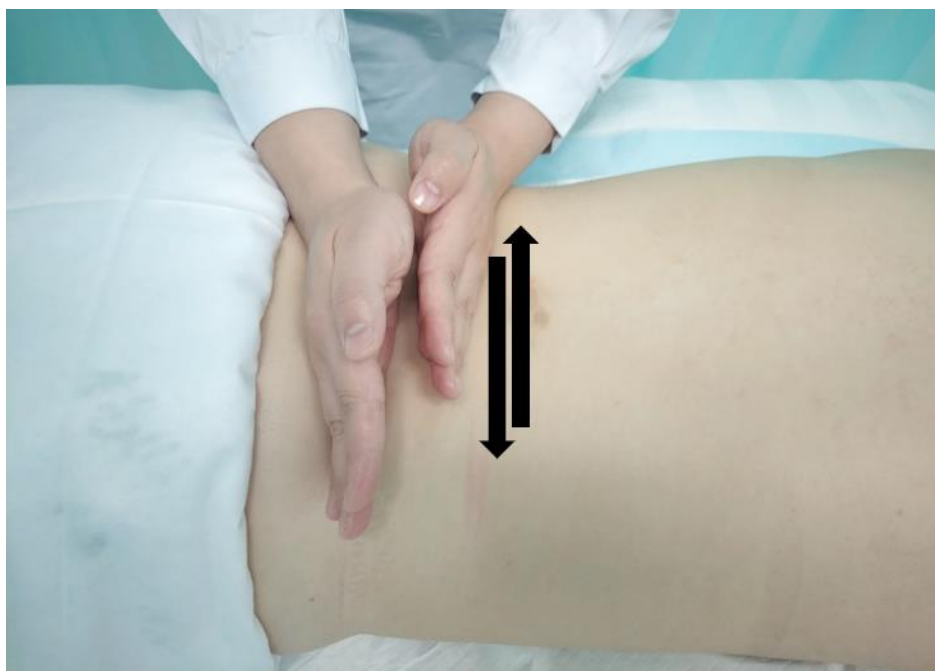

31 **Figure S4. Warm rubbing of the Baliao acupoint.** The person performing the  
32 treatment put the palms of the hands together, used the side of the palm as the focus  
33 point, and quickly rubbed back and forth until the entire Baliao acupoint area was  
34 covered, which fully relieved the lumbosacral pain. **1 minute.**

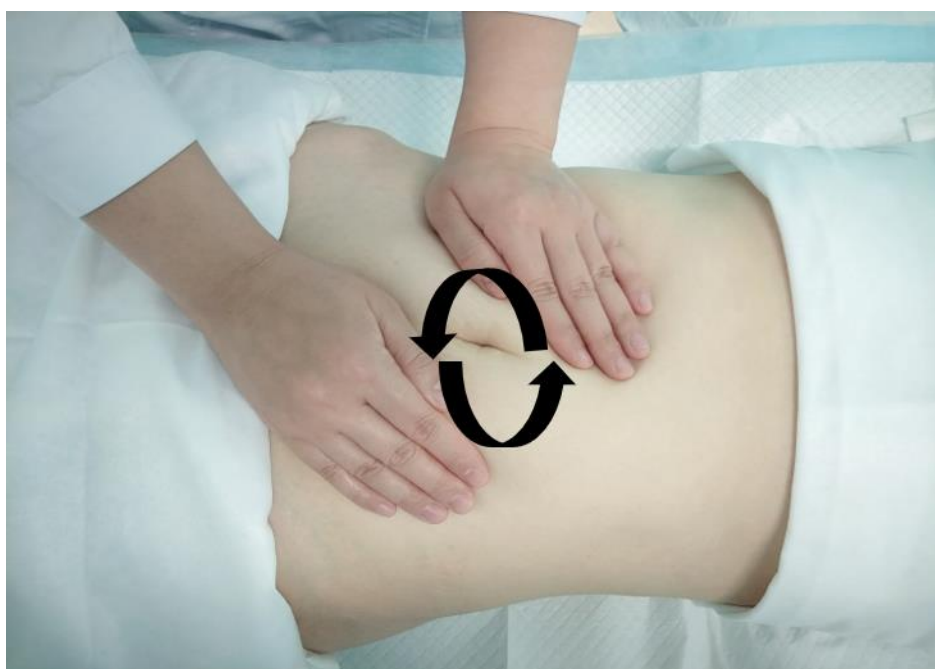

35 **Figure S5. Circular rubbing of the abdomen.** The person performing the treatment  
36 put the palms of both hands close to the abdomen; the palms of the hands were driven  
37 by the strength of the wrist, aiming to perform clockwise Tai Chi ring rubs along the

38 umbilicus. The rubbing was evenly applied to relax the abdominal muscles and promote  
39 blood circulation. **1 minute.**

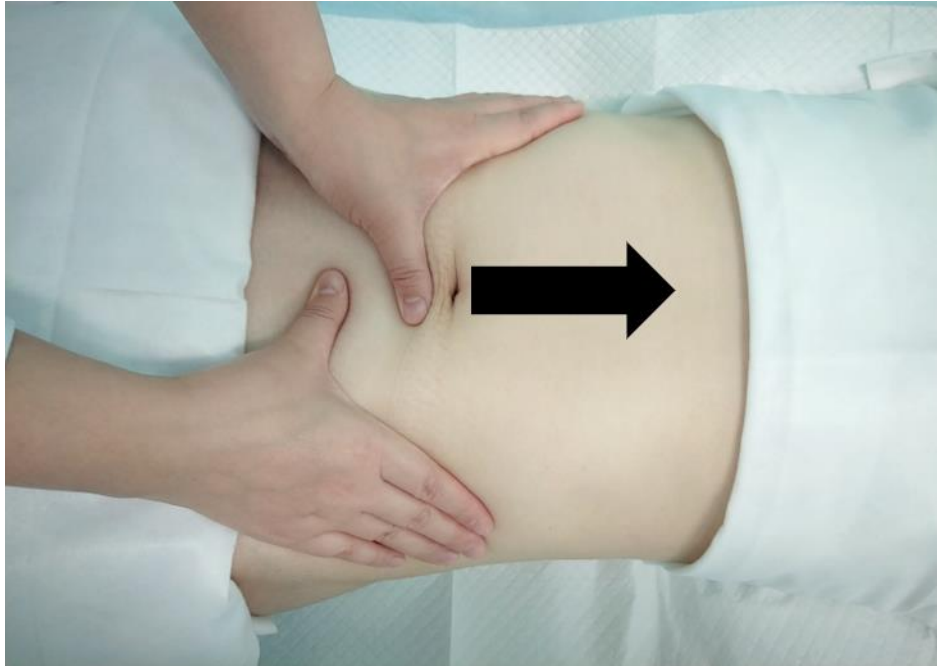

40 **Figure S6. Pushing Renmai acupoint with a finger.** The person performing the  
41 treatment opened the thumb and relaxed the other four fingers. The two thumbs  
42 alternately moved from the upper part of the pubic symphysis to the diaphragm in the  
43 one-way straight push and sunk slowly, softly, and evenly to relieve the pressure on the  
44 rectus abdominis. **1 minute.**

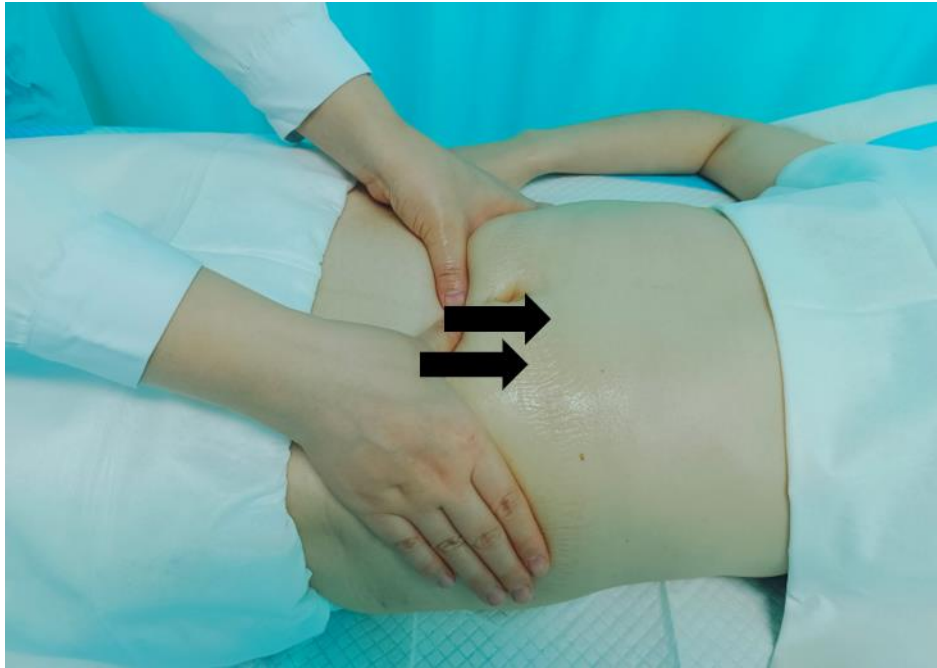

45 **Figure S7. Pushing Chongmai acupoint with a finger.** The person performing the  
46 treatment opened the thumbs of both hands, relaxed the other four fingers, alternately  
47 pushing the two thumbs along the direction of the abdomen Chongmai acupoint, and  
48 regulating blood. **2 minutes.**

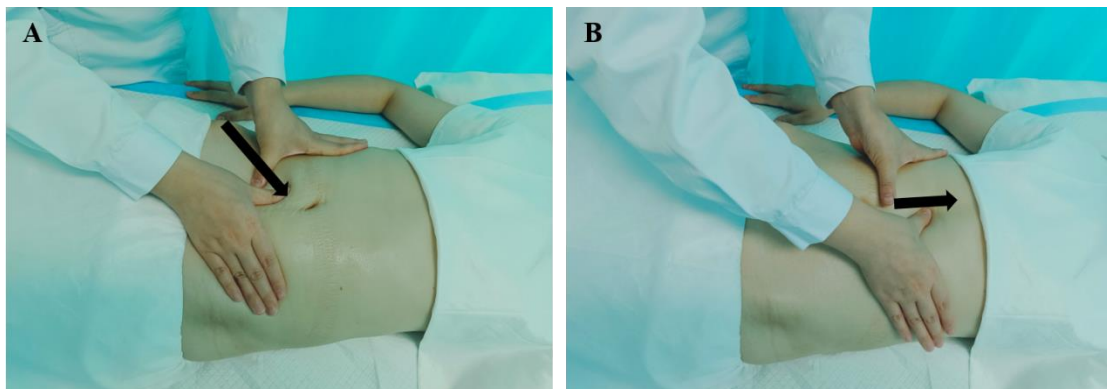

49  
50 **Figure S8. Pushing the abdominal wall artery with a finger. A).** The person  
51 performing the treatment opened the thumbs of both hands, relaxed the other four  
52 fingers, and **B).** alternately pushed the two thumbs from the lower 1/3 of the inguinal  
53 ligaments on both sides to the navel direction, and then pushed from the navel to the  
54 diaphragm straightly. **2 minutes.**

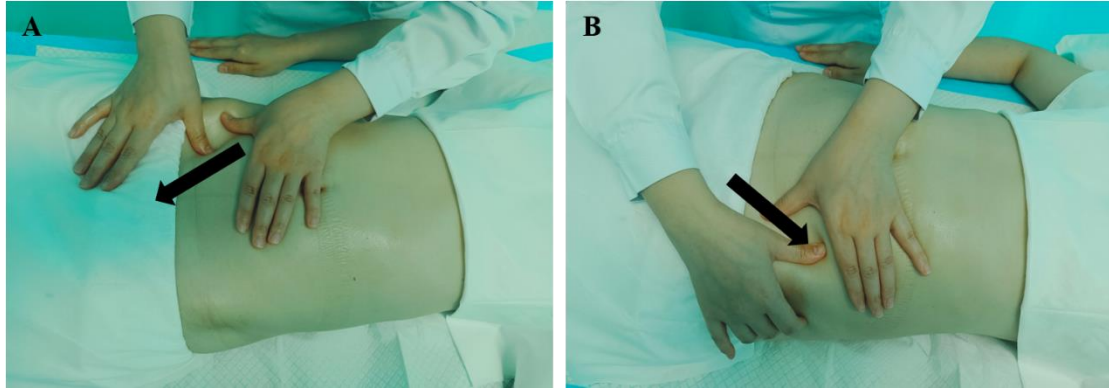

55

56 **Figure S9. Pushing the front Dai Mai acupoint with a finger.** A). The person  
57 performing the treatment opened the thumb, relaxed the other four fingers, alternately  
58 pushed the two thumbs from the proximal belt pulse point to the ipsilateral groin  
59 direction, and then B). pushed it along the pubic symphysis and the opposite groin until  
60 it reached the opposite side. **1 minute.**

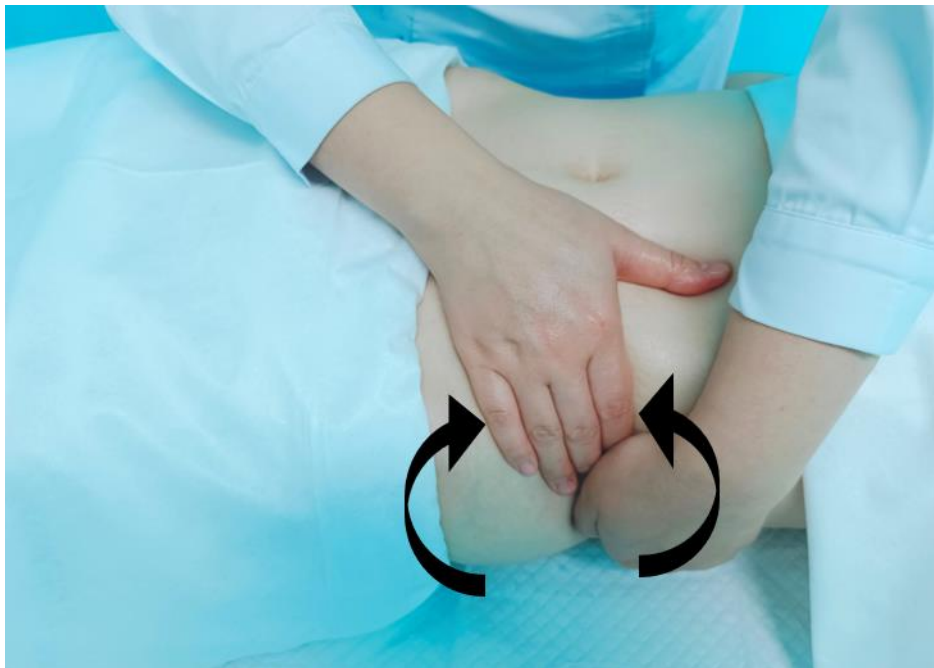

61 **Figure S10. Bilateral combing and pulling.** The person performing the treatment  
62 closely attached the palms of both hands to the skin of the waist, from the back of the  
63 axilla line to the umbilical direction, for alternate lifting movements from top to bottom  
64 to relieve back pain. **3 minutes.**

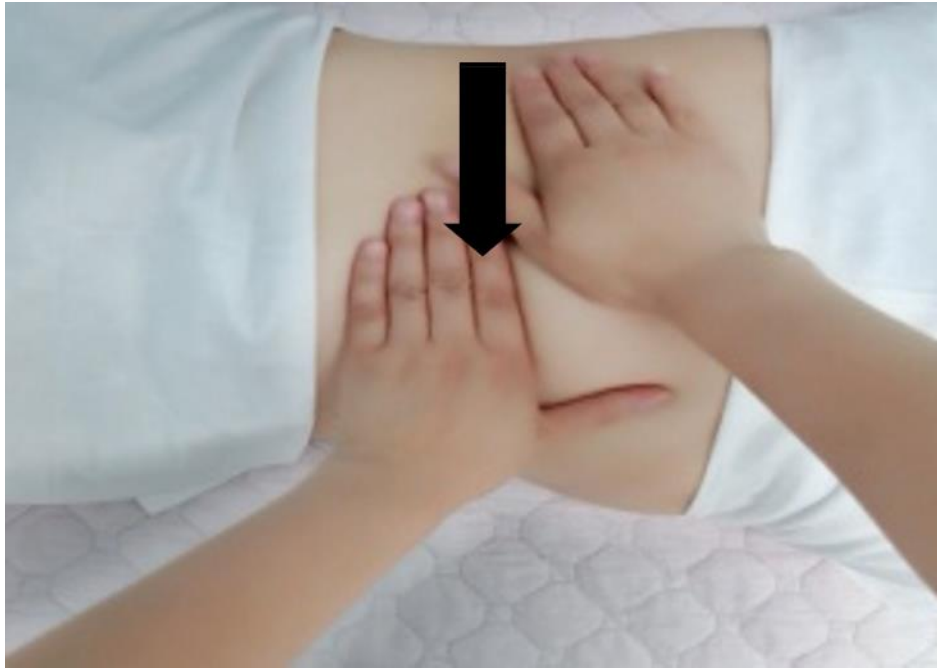

65 **Figure S11. Inhale and exhale squeeze.** The person performing the treatment placed  
66 the hands on the left and right sides of the umbilicus to instruct the parturient to do  
67 abdominal breathing. The patient was advised to bulge the abdomen when inhaling and  
68 contract the abdomen inward when exhaling. After the operator crossed the hands so  
69 that the palms of the hands rested on the upper and lower parts of the umbilicus, the  
70 patient was encouraged to squeeze inward and downward for 5 seconds to relax the  
71 abdominal muscles. **1 minute.**



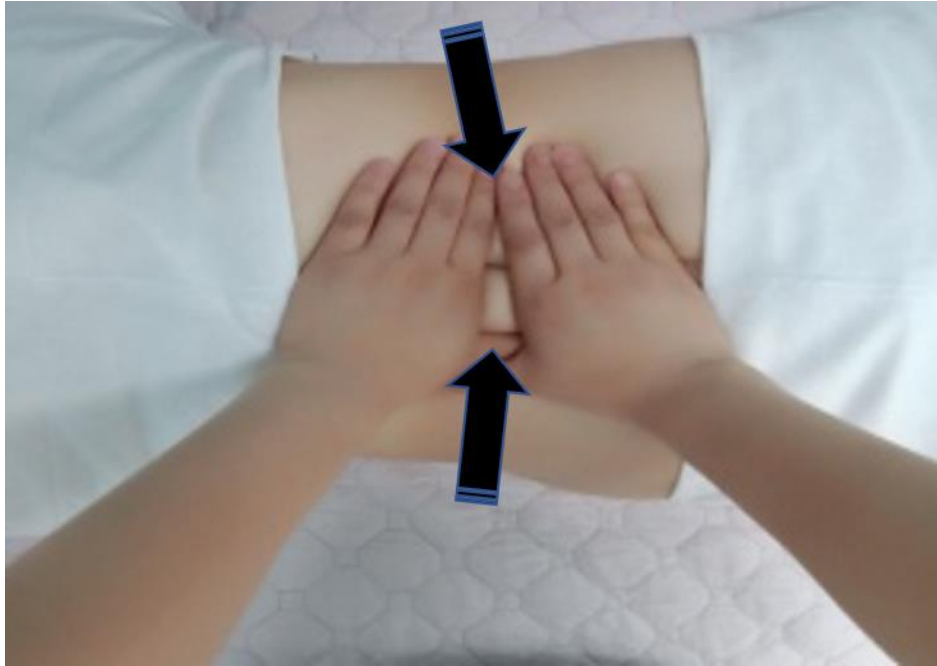

72 **Figure S12. Hip bridge training.** The patient was encouraged to relax and lie on the  
73 back with feet as wide as the hips. Then, he was told to bend his knees to 90° as much  
74 as possible. The person performing the treatment placed hands on both sides of the  
75 waist and abdomen. When breathing, the abdomen was to be contracted inward, and  
76 the hips extended, with the shoulders, hips, and knees in a straight line. This position  
77 was held for 5 seconds, and then gradually, the body was flattened, thereby increasing  
78 and strengthening the pelvic core muscles. **1 minute.**

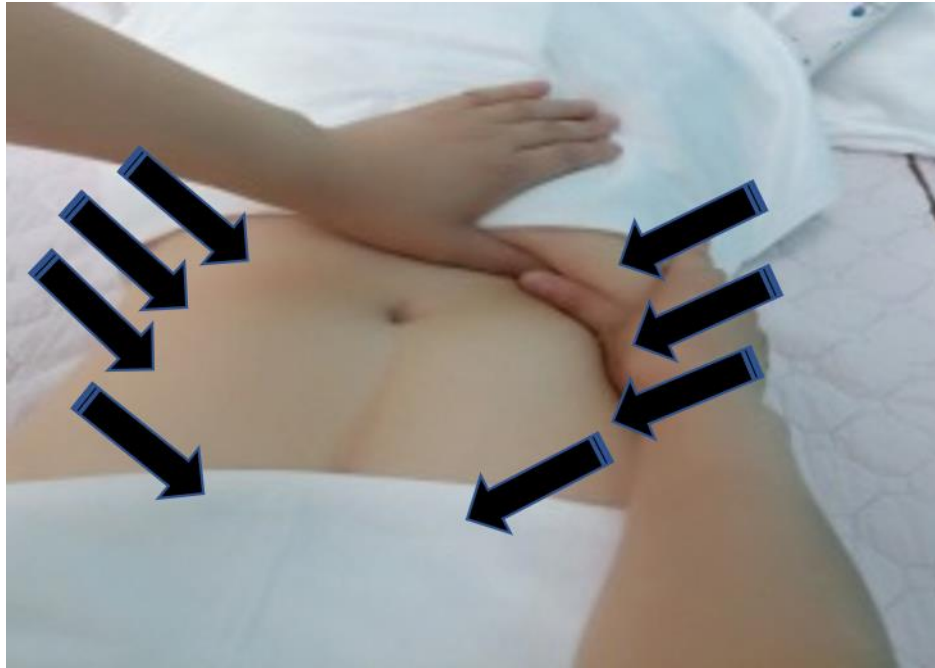

79 **Figure S13. Acupressure relaxation.** The person performing the treatment separated  
80 the thumbs of both hands from the other four fingers, overlapping the thumbs of both  
81 hands and pressing down firmly along the lower edge of the bilateral costal arch-the  
82 outer edge of the transversus abdominis-the medial edge of the ilium-the upper edge of  
83 the pubic symphysis. This position was held for 5 seconds each time, moving from light  
84 to heavy, and then from heavy to light, continuously communicating and adjusting the  
85 intensity. This method loosened the marginal fascia of the abdominal muscles. 7  
86 **minutes.**

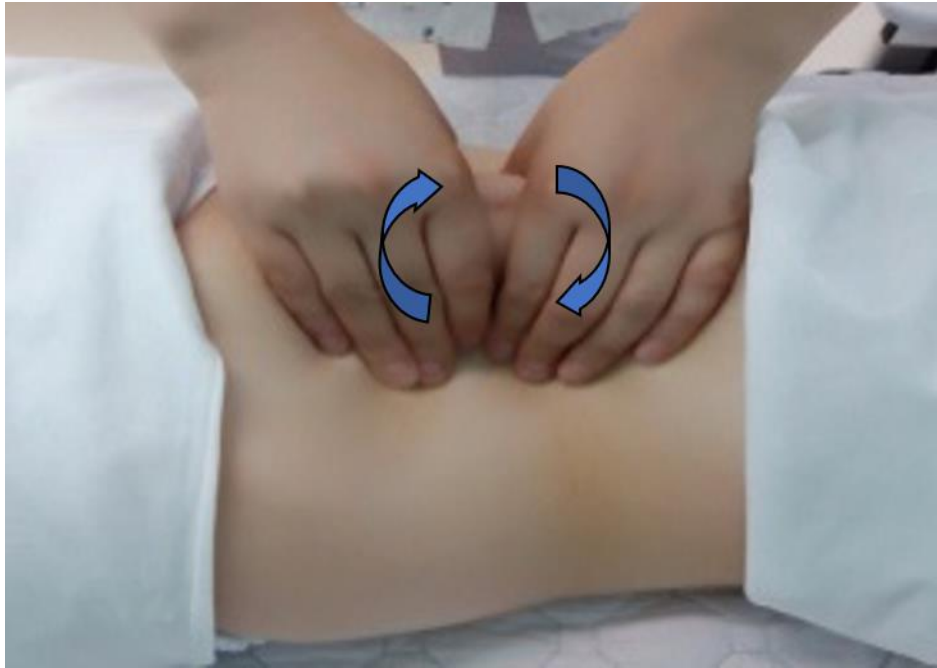

87

88 **Figure S14. Shake to loosen.** The person performing the treatment separated the  
89 thumbs of both hands from the other four fingers, lifted the abdominal muscles to the  
90 greatest extent, shook back and forth with the wrist as the fulcrum, and repeated until  
91 it covered the entire abdomen. This method loosened the deep fascia of the abdominal  
92 muscles. **3 minutes.**

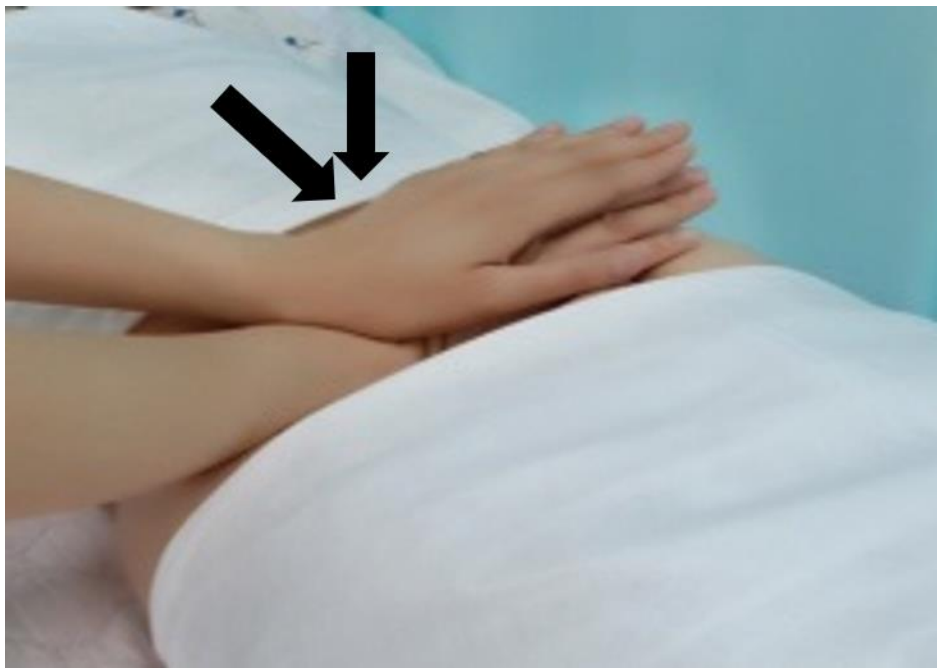

93 **Figure S15. Crossing and vertical push.** With the umbilicus used as the center, the  
94 abdomen was divided into eight parts, and the palm roots of both hands of the operator

95 overlapped and pushed inward and downward from the outer edge of the abdomen to  
96 the umbilicus in order, and held in each direction for 1 minute. When applying force,  
97 the arms were straightened, and the gravity of the upper body was used to push. When  
98 pressing the upper and lower ends of the rectus abdominis, special attention was paid  
99 to carefully gathering both rectus abdominis with one hand first, while the other hand  
100 was pressed toward the umbilicus at the same time. This method effectively aggregated  
101 the rectus abdominis. **15 minutes.**

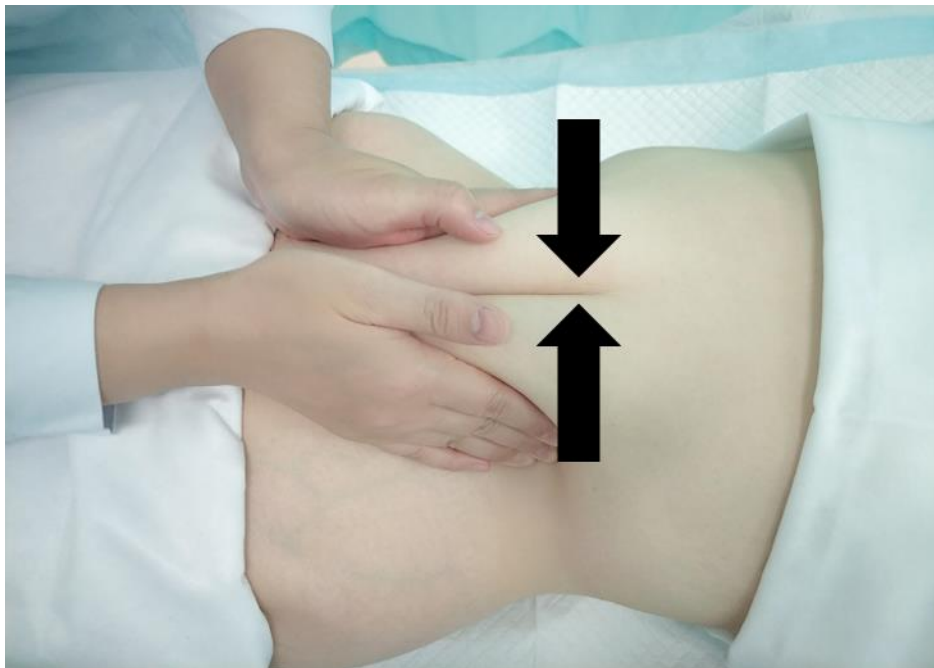

102 **Figure S16. Converge abdominal muscles.** The person performing the treatment  
103 placed the palms of the hands on both sides of the waist at the level of the umbilicus,  
104 pressed the hands relatively hard, and at the same time did a close movement inward  
105 and upward. He used uniform force throughout the process to further gather the rectus  
106 abdominis. **1 minute.**

107

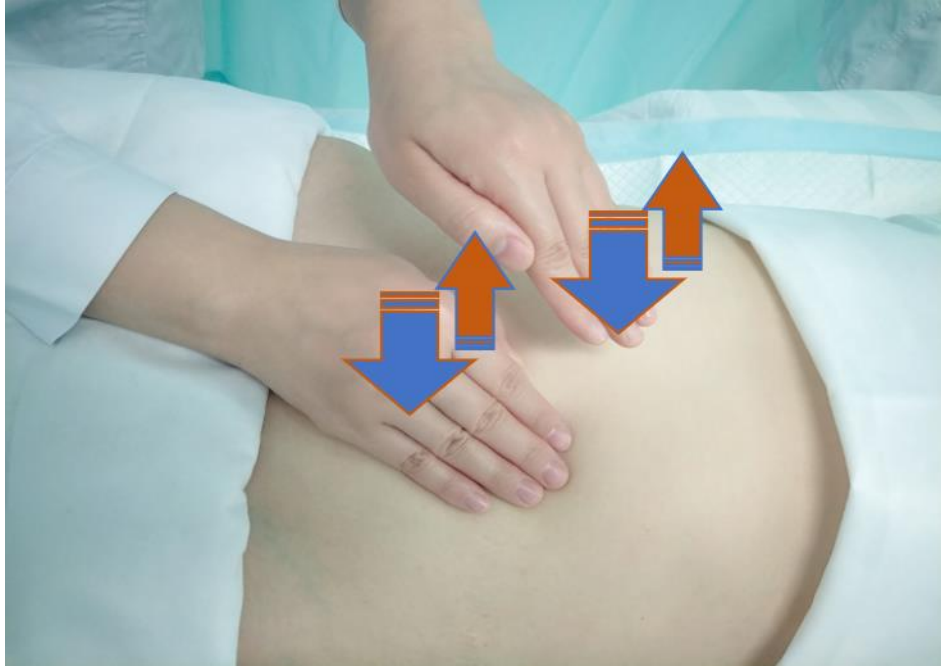

108 **Figure S17. Patting and relaxation.** The person performing the treatment put both  
109 hands in the shape of an empty cup, with the wrist as the fulcrum, alternately and  
110 quickly patting with both hands until the entire abdomen is covered. This method  
111 relaxed the abdominal muscles and enhanced vitality. **1 minute.**

112

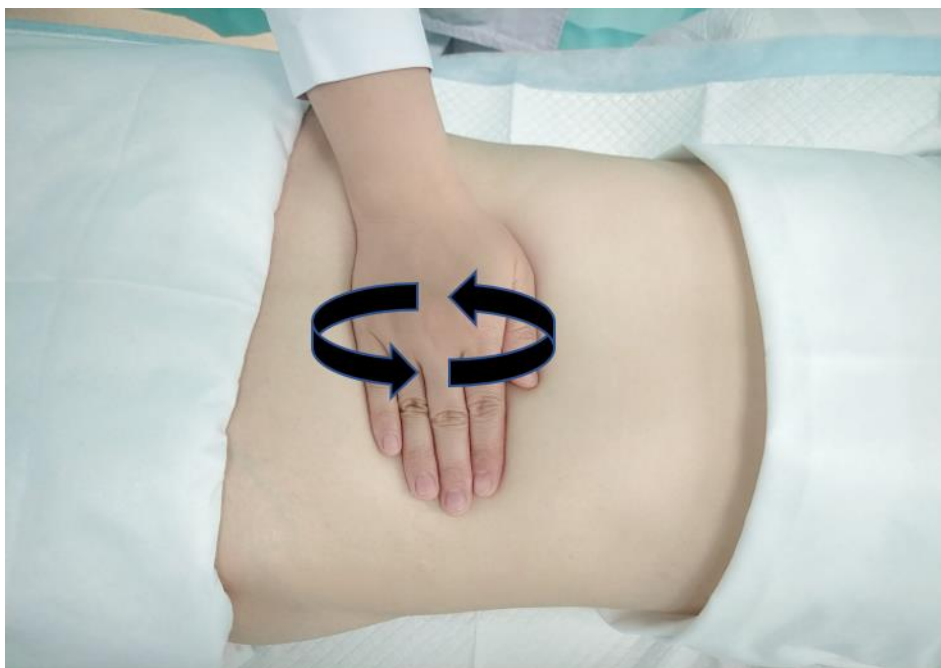

113 **Figure S18. Warm shaken Shenque acupoint.** The person performing the treatment

114 put the palms together and rubbed quickly until the palms became hot, and then  
115 immediately covered the Shenque acupoint with one hand and shook it gently. **1 minute.**  
116 Rest and adjustment. Patients were asked to adjust their breathing and rest on the back  
117 for 5 minutes.

118

119 **Part 2**

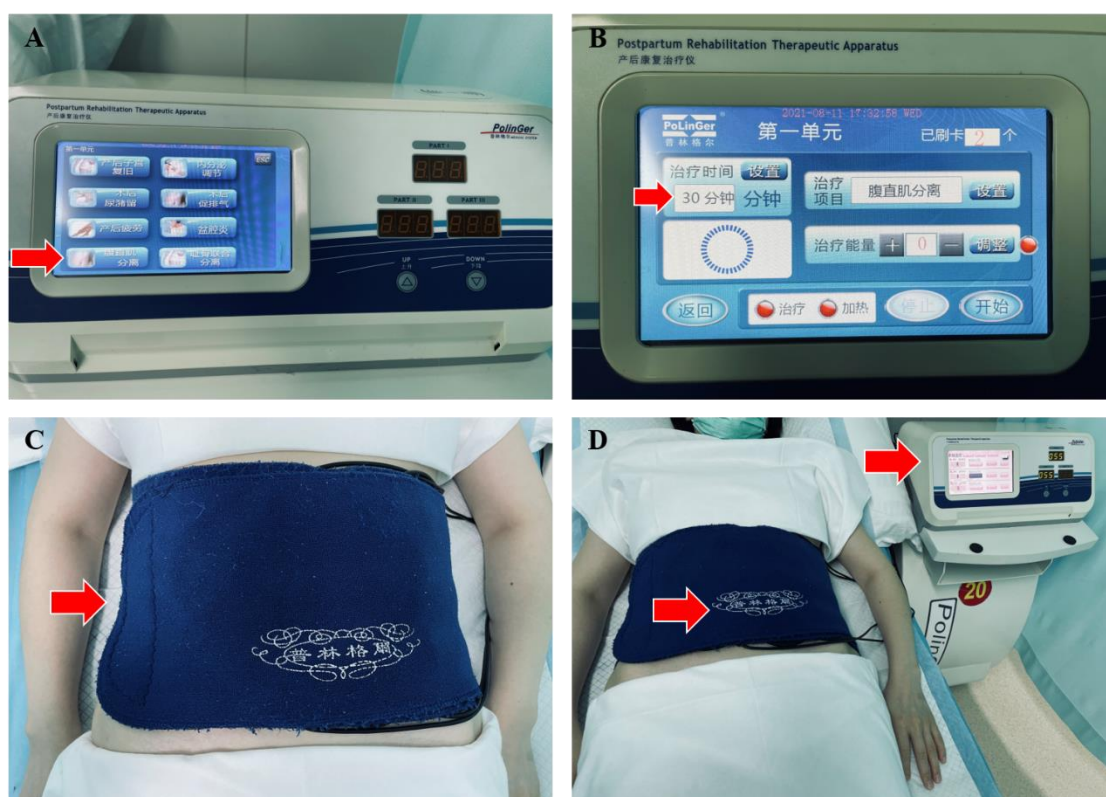

120 **Figure S19. Multi-system therapy device YS-400. A-B).** Multi-system treatment  
121 instrument YS-400 was used to treat diastasis rectus abdominis for **30 minutes**. During  
122 the application, the patient lied on his back without any anesthesia. A procedure suitable  
123 for the abdomen was adopted, and each course of treatment lasted precisely 30 minutes.  
124 **C-D).** It was necessary to place the electromagnetic abdominal band on the skin at the  
125 level of the umbilicus. The center of the magnetic coil was just above the umbilicus.  
126 The abdominal belt was fixed to minimize movement during the treatment. The  
127 stimulus intensity started at 0% and was slowly increased by the operator within 1

128 minute after treatment until it reached the patient's tolerance threshold. The stimulation  
129 intensity of the instrument was adjusted by asking the patient's feedback about being  
130 comfortable or not. The parturients were in a state of relaxation throughout the whole  
131 process.

132 Rest and adjustment. Patients were asked to adjust their breathing and rest on the back  
133 for 5 minutes.
